# Supplementary material for: Elucidation of molecular links between obesity and cancer through microRNA regulation
Source: PubMed Central journal article supplement (PMC7596939; doi:10.1186/s12920-020-00797-8), 2020-10-30
Supplement: 12920_2020_797_MOESM1_ESM.pdf [file 12920_2020_797_MOESM1_ESM.pdf]

## Supplementary Materials

### Animal model

Pathogen-free 14-day pregnant C57BL/6J mice were purchased from Jackson Lab (USA). NASH–HCC was induced in male mice by a single subcutaneous injection of 200  $\mu$ g STZ (Sigma, MO, USA) at 2 days after birth and feeding with HFD32 (CLEA Japan) ad libitum after 4 weeks of age. Male mice without any treatment, male mice treated with STZ alone and female mice treated with STZ–HFD were housed for control animals.

Liver samples were collected from male mice of five groups (4wks with STZ and then with HFD diet at 6 wks, 8wks, 12 wks and 20 wks) with their corresponding control groups. The number of mice per group per time point for gene and miRNA expression analyses was three, which gives a total of 30 samples.

### Transcript and miRNA Sequencing and data analysis

30 liver RNA samples were shipped on dry ice to BGI@CHOP (Philadelphia, PA) for RNA-Seq and small RNA-Seq library preparation and analysis. Specifically, Illumina-HiSeq 4000 platform was used to sequence transcriptome (paired-end 100bp) while the Illumina-HiSeq 4000 platform for small RNA (single-end 50bp). Raw sequence data were deposited in the NCBI SAR database (SUB7793657, official ID pending). Read quality control checks were performed using FastQC [Babraham, 2017]. Adaptors, primers, ambiguous bases, and bases having quality scores less than 30 were removed by cutadapt [Martin, 2011].

RNA-Seq analysis was performed using RSEM and EBSeq for gene expression quantification. For miRNA, high quality reads in the range of 18 - 40 bps remained for annotation and expression estimation using miRDeep2, a small RNA sequencing analytical pipeline [Friedlander, 2012]. Particularly, the read sequences were mapped to reference sequences of mouse genome, known precursor and mature miRNA, and other types of non-coding RNAs. The miRNA expression levels identified for each library were normalized as transcripts per million (TPM) according to the following formula:  $TPM = (\text{specific miRNA read count} \times 1,000,000) / \text{total miRNA mapped reads}$ .

### Identification of differentially expressed miRNAs and Genes

For the pairwise comparison, *DESeq2* package was used to identify the differentially expressed (DE)- miRNAs and genes in each condition group versus respective control. A threshold of fold change  $\geq 2$  and P value  $\leq 0.05$  was employed to identify DE-gene and miRNAs. The table below shows the statistics from this analysis.

|       | DE   | Genes | miRNAs |
|-------|------|-------|--------|
| 4wks  | Up   | 384   | 23     |
|       | Down | 612   | 79     |
| 6wks  | Up   | 11    | 35     |
|       | Down | 16    | 31     |
| 8wks  | Up   | 701   | 46     |
|       | Down | 114   | 69     |
| 12wks | Up   | 432   | 19     |
|       | Down | 72    | 57     |
| 20wks | Up   | 652   | 70     |
|       | Down | 201   | 108    |

## Comparison with

We have conducted a peer comparison with two other well-established methods, RACER[1] and MCMG[2], on miRNA target prediction using expression data, to demonstrate the performance of our approach. The test dataset was collected from 332 Hepatocellular carcinoma (LIHC) patients, available at TCGA[3], along with 34,986 experimental miRNA-target interactions detected by CLEAR-CLIP[4] in Hepatocellular carcinoma cell (Huh-7.5). We utilized three methods to predict the miRNA-target interactions in each stage of LIHC. First, we found that RACER and MCMG predicted significantly more interactions than miRDR (average number of predicted interactions: miRDR 1,634; RACER 10,371; MCMG 212,171) but less experimental validated interactions among the top ranked ones. When taking a close look at each stage, we ranked the predicted interactions from RACER and MCMG according to the score and compare with top-n predictions from miRDR at 100-intervals (Figure 1A). It is clear that miRDR outperformed two other methods by identifying significantly more validated interactions in each stage (p-value of one-sided Wilcoxon signed rank test is shown in the figure). Moreover, unlike RACER and MCMG, miRDR's performance was not affected by the input sample size. For example, RACER and MCMG predicted only half validated targets in smaller sets (in stage II (82), III (80) and IV (6)) than what they did in a bigger set (stage I (164)). At another evaluation, we compared the distribution of miRNA target count predicted by three methods, using the experimental data from CLEAR-CLIP as reference. As Figure 1B shows, the distribution of miRDR is very close to the experimental one, while RACER and MCMG tend to predict too many more targets for most miRNAs.

(1. Li, Y., Liang, M., Zhang, Z., Luo, J. & Zhang, Z. Regression analysis of combined gene expression regulation in acute myeloid leukemia. *PLoS Comput Biol* 10, e1003908 (2014).; 2. Chen, X., Slack, F. J. & Zhao, H. Joint analysis of expression profiles from multiple cancers improves the identification of microRNA-gene interactions. *Bioinformatics* 29, 2137–2145 (2013). ; 3. Ally, A. et al. Comprehensive and Integrative Genomic Characterization of Hepatocellular Carcinoma. *Cell* 169, 1327–1341.e23 (2017). ; 4. Moore, M. J. et al. miRNA-target chimeras reveal miRNA 3'-end pairing as a major determinant of Argonaute target specificity. *Nat. Commun.* 6, 8864 (2015)

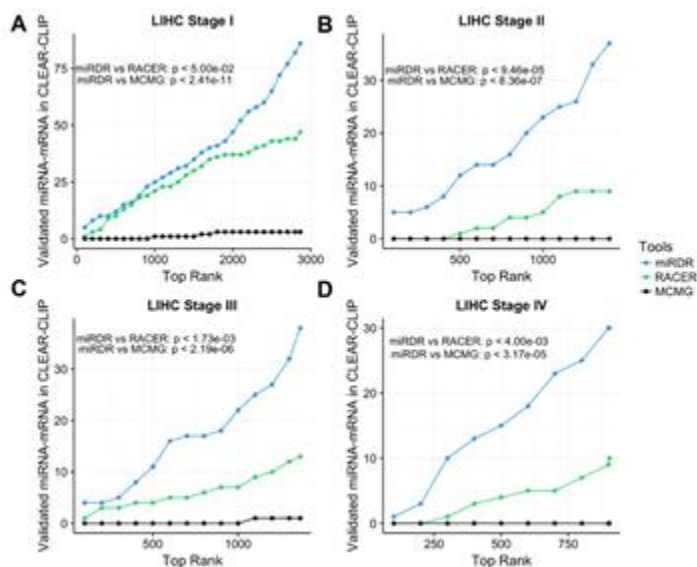

Figure 1A. Identified miRNA-target interactions identified by MiRDR, RACER and MCMG based on the Hepatocellular carcinoma (LIHC) data. The x-axis represents the top ranked interaction predicted by miRDR while the y-axis represents the count of validated interactions. The p-values were calculated by one-sided Wilcoxon signed rank test.

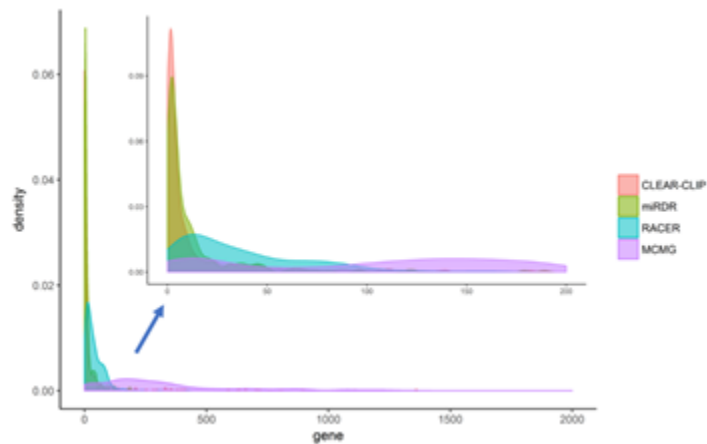

Figure 1B. Method comparison based on the counts of identified miRNA targets. X-axis: number of target genes; y-axis: miRNA percentage. Outer plot shows the overall distribution and the inner shows the zoom-in view of partial distribution in the range of [0, 200]

Through a comparison with two leading algorithms for miRNA target prediction based on expression profiles, miRDR has showed its advantageous predictive power with two major improvements. First, comparing with other methods, miRDR's predictions tend to include more validated interactions while not introducing significant high false prediction. This is an important aspect given the widely accepted critique on high false positive rate in current target prediction. Another advantage was the stable performance of miRDR on fairly limited sample size. The meta-analysis design minimized the impacts of sample variation on the target prediction, which seems promising to facilitate the detection of weak signals between miRNA and targets with insufficient samples.

Supplementary Table 1. The summary of differentially expressed genes and miRNAs, as well as miRNA-gene interactions detected in each disease condition.

|                                  | Obesity | KIRC | KIRP | LIHC | UCEC | BRCA  | LUAD | LUSC |
|----------------------------------|---------|------|------|------|------|-------|------|------|
| DE-Gene                          | 405     | 4944 | 4660 | 3696 | 5599 | 4231  | 4426 | 6365 |
| DE-miRNA                         | 9       | 72   | 72   | 79   | 144  | 69    | 73   | 97   |
| Detected gene-miRNA interactions | 9,123   | 475  | 805  | 813  | 301  | 1,011 | 800  | 718  |

(The detailed list is provided at [http://sbbi-panda.unl.edu/misc/obesity\\_prj\\_diff\\_genes.zip](http://sbbi-panda.unl.edu/misc/obesity_prj_diff_genes.zip); the list is already filtered according to  $|\log_2FC| \leq 1$  and  $pval \leq 0.05$ )

Supplementary Table 2. Common miRNA-gene regulatory interactions and pathways between obesity and SAG cancer.

|                                                                                    |                                                                                                                                                                                                                                                                                                                                                                                                                                                                                                                                                                                                                                                                                                                                                                                                                                                                                                                                                                                                                                                                                                                                                                                                                                                                                                                                                                                                                                                                                                                                                                                                                                                                                                                                                                                                                                                                                                                                                                                                                                                                                                                                                                                                                                                                                                                                |
|------------------------------------------------------------------------------------|--------------------------------------------------------------------------------------------------------------------------------------------------------------------------------------------------------------------------------------------------------------------------------------------------------------------------------------------------------------------------------------------------------------------------------------------------------------------------------------------------------------------------------------------------------------------------------------------------------------------------------------------------------------------------------------------------------------------------------------------------------------------------------------------------------------------------------------------------------------------------------------------------------------------------------------------------------------------------------------------------------------------------------------------------------------------------------------------------------------------------------------------------------------------------------------------------------------------------------------------------------------------------------------------------------------------------------------------------------------------------------------------------------------------------------------------------------------------------------------------------------------------------------------------------------------------------------------------------------------------------------------------------------------------------------------------------------------------------------------------------------------------------------------------------------------------------------------------------------------------------------------------------------------------------------------------------------------------------------------------------------------------------------------------------------------------------------------------------------------------------------------------------------------------------------------------------------------------------------------------------------------------------------------------------------------------------------|
| <b>Common interactions between obesity and cancers of Strong Association Group</b> | <b>miR-484 (361)</b><br>ABCD4/ABHD12/ABHD2/ACADS/ACLY/ACTA2/ACTB/ADAM10/ADCK2/ADRM1/AGK/AGL/AIFM1/AKAP13/AKT1S1/ALAS1/ALKBH5/AMMECR1L/AMPD2/ANAPC1/ANXA11/AP1B1/AP1G1/AP2M1/APLP1/ARAP1/ARFGEF2/ARHGDI/ARMC6/ATN1/ATP1A1/ATXN7L3/AUP1/AXIN1/BACE2/BAG5/BAMBI/BCAT2/BCCL2L1/BLMH/BMS1/BRI3/C1orf21/CAPRIN1/CASC3/CBX5/CBX6/CCDC47/CCNK/CD2AP/CDC34/CDCA7L/CDSD2/CHAF1B/CHD4/CHMP7/CHSY3/CHTF18/CLDN7/CNFN/CNIH4/COX8A/CPSF7/CRTAP/CUL5/CUTA/CYB5R3/CYFIP1/DCTN3/DCTN5/DDX28/DDX41/DDX54/DDX6/DGAT1/DGCR2/DGCR6L/DHX40/DIP2A/DLG5/DNAJA3/DNASE1L1/DNMT1/DST/DVL2/DYRK2/EEF2/EFNB3/EIF4B/EIF5B/EIF6/EMD/ENOPH1/ENTPD4/EXOC6B/EXOGE/EXOSC10/EZH2/FAM117A/FAM160B2/FBRS/FBXL18/FBXW2/FGFBP3/FIZ1/FKBP4/FLII/FLOT1/FURIN/FUT11/FUZ/FYCO1/GANAB/GAPDH/GATAD2B/GEMIN4/GFOD1/GHITM/GIGYF1/GIT1/GNL1/GNL2/GOLM1/GOT2/GPAM/GPATCH4/GRPEL1/GTF2H3/GTF2H4/GTF3C1/HARS2/HCF1/HECTD3/HIC2/HIPK1/HK2/HMGXB3/HOMER1/HSD17B4/HSP90AB1/HSPBP1/HYOU1/IFNAR2/IGF1R/INTS5/IPO5/IRS2/ISM2/ITGA5/ITGA9/IVD/JAG2/KDM5C/KIAA1109/KLC2/KNTC1/KREMEN1/L3MBTL2/LAMP1/LBR/LETM1/LMNB1/LONRF2/LRRC20/LSM12/LUC7L3/M6PR/MAF1/MAN2A2/MAP3K10/MAP7D1/MAST3/MCM3AP/MCM5/MCM7/MDH2/MDM2/MDN1/MEGF8/METTL2A/MLH3/MLLT1/MSH6/MSI2/MSL3/MTCH2/MTHFD1L/MTR/MYH9/MYO10/MYO5A/MYO9B/NCAPH/NCOR1/NDST1/NDUFV1/NEK1/NEO1/NFE2L1/NMD3/NME4/NO2L/NOM1/NOMO3/NOTCH3/NPEPPS/NRIP2/NUCKS1/NUDC/NUS1/OCRL/ORAI2/P4HB/PDE12/PDLIM2/PER1/PGAM1/PHB/PHF23/PHKA1/PHKB/PHLPP1/PHTF1/PI4KA/PIN1/PKD1/PLD3/PLOD1/PLXNA1/POLDIP3/POLR3K/POM121/PPP2R5A/PRDX1/PRKCD/PRMT7/PRPF8/PSMC2/PSMC3IP/PSMC5/PTGR2/PTRH2/PUF60/PYGB/RAB40C/RBM39/RBM42/RBMS2/RC3H2/RCC2/RCE1/RER1/REXO1/RGP1/RNF167/RNF5/RNMT/RPL21/RPL28/RPL36/RPN2/RPS14/RPS18/RPS24/RPS9/RRAGD/RUNX2/RXR/RSAP18/SCAP/SEC11A/SEMA4D/SEPHS1/SESN2/SETD7/SF3B2/SF3B3/SH2B1/SLC10A7/SLC11A2/SLC19A1/SLC2A1/SLC38A1/SLC39A13/SLC43A1/SMAD2/SNRPD2/SNX11/SORD/SPIRE1/STIP1/STK10/STMN1/STRN/SUPT16H/SYNE2/SYNGR2/TBC1D15/TBC1D22A/TBC1D2B/TBRG1/TCF19/TEP1/TEX261/TFAM/TIMELESS/TIPIN/TKT/TLN1/TMED9/TMEM184B/TMEM50A/TMOD2/TNFRSF12A/TNK2/TNKS1BP1/TNRC6B/TOMM40/TPST2/TRAF7/TRIM28/TRIM65/TROAP/TSC22D3/TSEN54/TSPAN3/TSPAN33/TSPAN6/TTYH3/TUBB/TUBB2A/TUBGCP4/TULP4/TUT1/TWF2/TXLNA/UBE2Z/UBQLN1/UBQLN2/UBQLN4/URGC/USP40/WAC/WDR26/WDR4/WEE1/YBX1/YWHAZ/ZC3H7B/ZFX/ZFYVE21/ZNF121/ZNF202/ZNF226/ZNF264/ZNF362/ZNF383/ZNF48/ZNF792 |
|                                                                                    | <b>miR-331-3p (137)</b><br>ACTR1A/ANKRD52/AP2A2/APBB1/ARAF/ARHGFE1/ATP8B2/ATRX/AURKAIP1/BOK/BRPF1/C10orf88/C12orf65/CAMK2G/CDCA4/COASY/COCH/COPS3/COX7C/CTNBN1/CUEDC2/DDX56/DEF8/DGKZ/DHX8/DMAP1/EARS2/EFNB2/EIF2S3/EIF4A2/EIF4A3/EIF4G2/EPB41L2/EPHA7/EXOC6B/EXOC7/FAM168B/FASN/FASTK/FBXL5/FBXO44/FLII/FLT4/FUS/GATAD2B/GNAS/GNPAT/GPI/GSS/GTF3C4/HNRNPH1                                                                                                                                                                                                                                                                                                                                                                                                                                                                                                                                                                                                                                                                                                                                                                                                                                                                                                                                                                                                                                                                                                                                                                                                                                                                                                                                                                                                                                                                                                                                                                                                                                                                                                                                                                                                                                                                                                                                                                    |

/HPS1/HSPD1/IGF2BP2/IGFBP5/IL4R/KLC2/LETM1/MAP4/MARK3/MECP2/MED22/MNT/MRPS26/MYB  
BP1A/NCLN/NDST1/NRBF2/NXT1/PCBD1/PHGDH/PHLDB3/PI4KB/PINX1/PITX1/PLCH2/PLXNB2/POL  
R2L/POLR3H/PPARD/PPIL1/PSMC4/PSMD6/PSME3/PTPN13/RANGAP1/RASL10B/RDX/RNASEH1/RN  
F145/RPL34/RPL7A/RPS12/RPS14/RPS9/RRBP1/RRP1B/RRP7A/SCD/SF3B2/SFPQ/SH3BP2/SH3PXD  
2A/SLC25A14/SLC39A8/SMG5/SMG6/SMO/SMPD4/SPTB/SS18/SSR4/STK35/STX16/SUV39H1/SYK/S  
YNM/TIA1/TJAP1/TOMM20/TRAP1/TSFM/UBA1/UBE2Q2/UBQLN1/VAPB/VPS37B/WASH3P/XRCC5/YT  
HDF1/ZNF483/ZNF503/ZNF512B/ZNF598/ZNF607/ZNF608/ZNF714

**miR-324-5p** (108) -  
ACTN4/AGAP1/AHNAK/ANAPC13/ANXA6/ANXA7/ARFGAP2/ARHGEF10L/ARPP19/ASF1B/ASS1/BOP1  
/BTBD2/BTN3A1/CACHD1/CBS/CDC123/CDS1/CENPB/CLN6/CLPB/COL14A1/COL6A1/COPS3/COX5A  
/CUEDC2/DDX11/DYRK1A/EDC3/ESD/FAM43B/FAM83H/FBL/FOXC1/GIGYF1/GMNN/GNB2/HMGXB3/  
HNRNPA1/HSPD1/IPO5/ITM2C/KIF3B/KLHDC3/LDHB/MAPKAPK2/MDC1/MEA1/MID2/MPI/MRPL14/MS  
H6/MTHFD1/MYO1C/MYOD1/NANS/NDUFS1/NUP160/OSTC/PA2G4/PACS1/PAK4/PARM1/PDRG1/PG  
AM1/PGK1/PIAS4/PKD1/PMS2/POLD1/POLR2A/PSMA4/PSMD4/PTK7/PXDN/RAB1B/RAP2B/RAPH1/R  
PL27/RPL37/RPP30/RPS2/SAP30BP/SCARB1/SCD/SCD5/SEC23IP/SLC25A3/SMAD2/SMARCD2/SNX  
7/SOBP/SPEN/SPOPL/TBCB/TIMELESS/TMEM129/TMEM63B/TMEM8B/TRERF1/TUBA1B/TUBA1C/TU  
FM/UBE2I/USP16/WIZ/ZIC5/ZMYND11

**miR-615-3p** (75) -  
ABT1/ACTN4/ALDH1B1/ANKRD36B/ANO6/ATRX/BCKDK/BICD2/BRD2/BTN3A2/CCND2/CHD4/CTNNA  
1/CYC1/DBN1/DNM1L/EIF3M/EIF4G1/EPDR1/EPN2/EWSR1/FAM13A/FNBP1/FRAT2/FSTL1/GANAB/G  
GA3/GIGYF1/GNL3/GPSM1/HDAC7/HRAS/KDM4B/KIAA1109/KIFC2/LIG1/LRPAP1/MAPKAPK2/MATR3  
/MCM10/MORF4L1/MRPL23/NCAPD2/NOP2/NUPR1/OGFOD1/PA2G4/PABPC4/PDCD11/PDS5A/PFDN  
6/PKD1/PLXNA1/POLR1A/POLR2B/PTGFRN/PTMA/RARA/RNF25/SCARB1/SEC24C/SEPHS2/SF3B1/S  
GMS2/SLC1A4/SMC3/SMG1/SOCS7/TPM3/TRPC1/TUBB2B/UBA1/XYLTY2/YTHDF2/ZNF687

**miR-423-3p** (69) -  
ABHD12/ADCY1/AKT2/ALAS1/APP/ARFGAP1/ATP6V0D1/ATP8B2/B4GALNT3/C1orf56/CALR/CEP78/C  
OPA/CYFIP2/DGCR6L/DPYSL3/ETF1/FADS2/FASN/FEM1A/FLII/FOXJ2/FRMD4A/GLDC/HDLBP/IER3IP  
1/IGF2R/KDELRL1/KIAA0319L/LARP1B/LARP4/LRRC8B/LSM4/LYPLA2/MAP3K1/MCM2/MOGS/MTHFR/  
NPTX2/NTN1/NUBP1/PEPD/POLR2L/POM121/PPP2R1B/PSMD1/PSMD8/PTCD2/PTMS/RANBP2/RBB  
P4/REEP2/ROBO1/RPL3/RPL4/SCML2/SET/SH2B1/SHMT2/SLC25A15/SMARCD2/TAGLN2/TBCE/TXL  
NA/UBE4B/URB2/WNK1/YIPF5/ZNF324

**miR-423-5p** (59) -  
ABCC5/AKAP13/ARHGAP32/ARL6IP1/ATN1/ATP6V1E1/BCCIP/CCNF/CD81/CHD8/DDX21/DDX24/EPM  
2AIP1/FAM83H/FAM98A/FHOD1/FKBP4/GDF11/GGA3/GNG12/KCTD15/KCTD2/LMNB2/LRCH4/MED28  
/MFGE8/MICALL1/MIER2/MRPL34/NECAP1/NFKB2/NMD3/NOS1AP/NPLOC4/NSD1/PAX2/PCBP1/PDP  
K1/PLCB1/PMPCA/PTTG1/RABAC1/RC3H1/RCE1/RPS15A/SALL1/SAR1B/SF3B3/SLC7A2/SLC9A3R1/  
SQSTM1/TDRKH/TMUB1/UBE2L3/ULK1/USP6/VAC14/WBP2/YWHAZ

**miR-455-3p** (57) -  
AGL/AP1B1/ATP6AP1/BAIAP2/BCL2L12/BRD4/BTF3/CISD2/CLSTN1/COL3A1/CRIM1/DAZAP2/DDX55/  
DYNC1H1/EIF2B2/EIF4G1/ELOVL1/EPA7/ERI3/EVC/FDX1/GALM/GBA2/GIGYF2/HMGN2/HYOU1/INT  
S10/INTS4/LRP11/LYRM1/MAEA/MAP1B/MGRN1/N4BP2L2/NPTN/PFKP/PGM3/PGRMC1/PLEKHM2/P  
TPRF/PWP2/RANBP3/RHOC/RNF216/RPS5/RRP1B/SAT1/SCD/STX16/TFE3/TNRC18/TOR1AIP2/U2A  
F2/USP10/USP5/WRAP53/XPR1

**miR-324-3p** (42) -  
ACACA/ANKRD27/ARHGAP17/ATXN2L/BAHD1/CAPZB/COX7A2L/CSNK1A1/CXXC1/CXXC5/DDX18/D  
LST/EEF2/FADS2/GAPDH/HSP90AA1/HSPA9/HUWE1/IQGAP1/ITCH/KDM2B/MED15/NHP2/PNMA2/P  
OLR2C/PPFIA1/PPIE/PRKAR1A/PUM1/RPL10A/RPL31/RPLP0/RPS3/RPS5/RPS8/RUVBL2/SAP18/SBF  
1/SMS/TMED9/TRAK1/VPS18

**miR-125a-5p** (38) -  
ATXN7L3/CASC4/CGNL1/CLCN7/COL4A1/DLST/EMID1/FBXO10/IP6K1/KIAA0232/LAMB1/MACF1/MAP  
3K1/MAT2A/MORC2/MRPL50/NNT/OTUB2/PAM/PDCL3/PEG10/PGM3/PLS3/PPP2R5E/PRC1/PREPL/R  
PS2/SLFN11/TBC1D1/TFRC/THRAP3/TPM4/UBE2G2/XPO1/YES1/YIPF4/ZDHHC9/ZMYND19

**miR-342-3p** (35) -  
ABL1/ACTG1/ARIH2/CBX1/CCDC6/CRB2/EEF2/FIBP/FIGN/FN3KRP/GART/GJA1/GOT2/HNRNPC/IDH3  
B/IDS/INO80D/KCTD15/KPNA2/METTL2A/NAPG/NOP2/PRKCSH/PSAT1/PWP2/RPL26/RPL27A/RPS3A  
/RRM2/SLC30A9/TACC1/TCP1/TRERF1/VPS35/XPOT

|                                                              |                                                                                                                                                                                                                                                                                                                                                                                                                                                                                                                                                                                                                                                                                                                                                                                                                                                                                                                                                                                                                                                                                                                                                                                                                                                                                                                                                                                                                                                                                                                                                                                                                                                                                                                                                                                                                                                                                                   |
|--------------------------------------------------------------|---------------------------------------------------------------------------------------------------------------------------------------------------------------------------------------------------------------------------------------------------------------------------------------------------------------------------------------------------------------------------------------------------------------------------------------------------------------------------------------------------------------------------------------------------------------------------------------------------------------------------------------------------------------------------------------------------------------------------------------------------------------------------------------------------------------------------------------------------------------------------------------------------------------------------------------------------------------------------------------------------------------------------------------------------------------------------------------------------------------------------------------------------------------------------------------------------------------------------------------------------------------------------------------------------------------------------------------------------------------------------------------------------------------------------------------------------------------------------------------------------------------------------------------------------------------------------------------------------------------------------------------------------------------------------------------------------------------------------------------------------------------------------------------------------------------------------------------------------------------------------------------------------|
|                                                              | <p><b>miR-769-5p (30)</b> - ADPGK/AK1/ATP11A/CNOT6/CREBBP/DDX24/DPH5/EIF5A/FANCD2/FBXO45/FKRP/GOT1/GPCPD1/IGSF3/LPIN2/MAPK1/NBPF15/PHLPP2/PLEKHA1/PRDX4/PRUNE2/QRSL1/RNF40/RPL14/SCML2/SPAG5/TMEM165/TRMT61A/UBQLN4/WDR18</p> <p><b>miR-361-5p (27)</b> - ACLY/ATP6V1A/BSG/CNOT2/CYCS/DCTN1/DOCK6/EGFL7/GRK6/GSPT1/LNPEP/MAGEF1/MDC1/PPA1/PRPF8/PSMD2/RAVER1/RPS2/SETD1A/SLC25A5/SLC30A5/TMEM62/TP53BP1/UCK2/VBP1/VCP/WBP2</p> <p><b>miR-339-5p (14)</b> - ABCC1/AKAP10/ANKRD52/BRSK1/HSPA12A/MAP4/NCSTN/PAXIP1/PGD/PSAP/SMC1A/SOX11/SSR2/SUCLG1</p> <p><b>miR-671-5p (13)</b> - C17orf58/CHPF2/CRLF3/CRTC3/GPI/LGALS3BP/MOSPD3/NACA/NRSN2/R3HDM2/RPL23A/U2AF2/XRCC6</p> <p><b>miR-28-5p (10)</b> - AAAS/CENPV/CS/GEMIN4/IMPDH1/KLHL12/SIK1/TUFM/TULP4/ZBTB47</p> <p><b>miR-330-5p (8)</b> - BAD/CARD11/FTSJ3/NHP2/POMGNT1/SPTBN2/STX1B/TUFT1</p> <p><b>miR-532-3p (8)</b> - AFF4/CRY2/EIF3I/KLHL15/MED14/PPP3R1/SBK1/SCMH1</p> <p><b>miR-107 (5)</b> - DHX16/GNS/TCF19/TMEM87A/ZADH2</p> <p><b>miR-28-3p (5)</b> - CYB5B/HIC2/INTS2/SNX1/VPS53</p> <p><b>miR-501-5p (5)</b> - GAPDH/HSP90AA1/HSP90AB1/RPS19/TAF15</p> <p><b>miR-502-3p (5)</b> - ASXL2/COMMD4/DCTN2/MGAT5/PITRM1</p> <p><b>miR-146b-5p (4)</b> - AKT3/NSFL1C/PLA2G4A/XPO4</p> <p><b>miR-193a-3p (3)</b> - CPSF2/SEMA3D/SNRPB2 <b>miR-320b (3)</b> - EPB41/GNAS/PPIA</p> <p><b>miR-330-3p (3)</b> - PIK3R4/SLIT2/SNRPD3 <b>miR-361-3p (3)</b> - CIAPIN1/NFATC3/PRMT3</p> <p><b>miR-140-3p (2)</b> - AIFM2/FAU <b>miR-140-5p (2)</b> - CASD1/GATA6 <b>miR-188-5p (2)</b> - ABCC5/SBNO1 <b>miR-3200-3p (2)</b> - DDB1/TPT1 <b>miR-342-5p (2)</b> - DDX1/SMARCA4</p> <p><b>miR-362-5p (2)</b> - NOMO3/TMF1 <b>miR-501-3p (2)</b> - DENND4B/MCM2 <b>miR-193a-5p (1)</b> - ZC3H7B <b>miR-326 (1)</b> - PBX2 <b>miR-3615 (1)</b> - NIPA2 <b>miR-455-5p (1)</b> - TRIM23 <b>miR-574-3p (1)</b> - MKRN1 <b>miR-576-5p (1)</b> - PNMA2</p> |
| <p><b>Enriched pathways based on common interactions</b></p> | <p>Adherens junction, Adrenergic signaling in cardiomyocytes, AMPK signaling pathway, Axon guidance, Biosynthesis of amino acids, Biosynthesis of antibiotics, Carbon metabolism, Cell cycle, cGMP-PKG signaling pathway, Chemokine signaling pathway, Cysteine and methionine metabolism, Endocytosis, Estrogen signaling pathway, Focal adhesion, FoxO signaling pathway, Glucagon signaling pathway, Glycolysis / Gluconeogenesis, HIF-1 signaling pathway, Hippo signaling pathway, HTLV-I infection, Insulin signaling pathway, Lysosome, MAPK signaling pathway, mRNA surveillance pathway, Neurotrophin signaling pathway, Non-alcoholic fatty liver disease (NAFLD), Oocyte meiosis, Oxidative phosphorylation, Oxytocin signaling pathway, Phagosome, PI3K-Akt signaling pathway, Platelet activation, Progesterone-</p>                                                                                                                                                                                                                                                                                                                                                                                                                                                                                                                                                                                                                                                                                                                                                                                                                                                                                                                                                                                                                                                                 |

|  |                                                                                                                                                                                                                                                                                                                                                                                                                                                                                                                           |
|--|---------------------------------------------------------------------------------------------------------------------------------------------------------------------------------------------------------------------------------------------------------------------------------------------------------------------------------------------------------------------------------------------------------------------------------------------------------------------------------------------------------------------------|
|  | <p>mediated oocyte maturation, Proteasome, Protein processing in endoplasmic reticulum, Proteoglycans in cancer, Purine metabolism,</p> <p>Pyrimidine metabolism, Rap1 signaling pathway, Ras signaling pathway,</p> <p>Regulation of actin cytoskeleton, Ribosome, Ribosome biogenesis in eukaryotes, RNA degradation, RNA transport, Sphingolipid signaling pathway, Spliceosome, Thyroid hormone signaling pathway, Transcriptional misregulation in cancer, Ubiquitin mediated proteolysis, Wnt signaling pathway</p> |
|--|---------------------------------------------------------------------------------------------------------------------------------------------------------------------------------------------------------------------------------------------------------------------------------------------------------------------------------------------------------------------------------------------------------------------------------------------------------------------------------------------------------------------------|

Supplementary Table 3. Expression correlation between gene and miRNA in the A) NAFLD-related interactions and B) LIHD related interactions, in the mouse liver samples

A)

| Gene   | miRNA       | Expression correlation (PCC)<br>at 20wks |
|--------|-------------|------------------------------------------|
| ITCH   | miR-324-3p  | -0.70315                                 |
| RXRA   | miR-423-3p  | -0.33742                                 |
| JUN    | miR-342-3p  | -0.25494                                 |
| AKT2   | miR-423-3p  | -0.22478                                 |
| MLX    | miR-484     | -0.02209                                 |
| CASP7  | miR-484     | 0.098137                                 |
| SREBF1 | miR-484     | 0.142232                                 |
| CYCS   | miR-361-5p  | 0.168155                                 |
| CEBPA  | miR-193a-5p | 0.449619                                 |
| AKT3   | miR-146b-5p | 0.578952                                 |
| IRS2   | miR-484     | 0.843737                                 |

B)

| Gene   | miRNA      | Expression correlation (PCC)<br>At 20wks |
|--------|------------|------------------------------------------|
| NDUFV1 | miR-484    | -0.97611                                 |
| SMS    | miR-324-3p | -0.95962                                 |
| DEAF1  | miR-324-5p | -0.95048                                 |
| ANXA11 | miR-484    | -0.94884                                 |
| COL3A1 | miR-455-3p | -0.94040                                 |
| APTX   | miR-342-3p | -0.93215                                 |

|          |            |          |
|----------|------------|----------|
| TRAP1    | miR-342-3p | -0.93144 |
| PHLDB3   | miR-331-3p | -0.92962 |
| DCTN1    | miR-361-5p | -0.92215 |
| TFAM     | miR-484    | -0.92074 |
| YWHAZ    | miR-455-3p | -0.91321 |
| PRDX1    | miR-484    | -0.91157 |
| NUDC     | miR-484    | -0.89824 |
| ARL6IP4  | miR-484    | -0.89722 |
| RER1     | miR-484    | -0.89235 |
| RAB3IP   | miR-484    | -0.87295 |
| RHOC     | miR-455-3p | -0.87010 |
| GRPEL1   | miR-484    | -0.86690 |
| BRI3     | miR-484    | -0.86627 |
| TRAP1    | miR-324-5p | -0.86528 |
| CBX5     | miR-484    | -0.86513 |
| PPARGC1B | miR-484    | -0.86033 |
| SORD     | miR-484    | -0.85959 |
| SYNGR2   | miR-484    | -0.85806 |
| FBL      | miR-324-5p | -0.85619 |
| AUP1     | miR-484    | -0.85482 |
| MKNK2    | miR-423-5p | -0.85426 |
| MAP1B    | miR-455-3p | -0.85392 |
| MRPS24   | miR-484    | -0.85125 |
| RAB40C   | miR-484    | -0.84929 |
| SEPHS1   | miR-484    | -0.84750 |
| RING1    | miR-484    | -0.84408 |
| UBA2     | miR-330-5p | -0.84337 |
| PWP2     | miR-455-3p | -0.84240 |



|         |             |          |
|---------|-------------|----------|
| MAEA    | miR-455-3p  | -0.84131 |
| RRP1B   | miR-455-3p  | -0.83698 |
| PPP2R5A | miR-484     | -0.83675 |
| BAMBI   | miR-484     | -0.83125 |
| DGAT1   | miR-484     | -0.83069 |
| MARK3   | miR-331-3p  | -0.82721 |
| COX5A   | miR-484     | -0.82492 |
| DCTN3   | miR-484     | -0.82425 |
| ULK1    | miR-423-5p  | -0.82201 |
| FUT11   | miR-331-3p  | -0.82053 |
| MTA2    | miR-423-3p  | -0.81762 |
| RPLP2   | miR-484     | -0.81236 |
| IDH3B   | miR-342-3p  | -0.80804 |
| TMEM62  | miR-361-5p  | -0.80579 |
| ATL2    | miR-484     | -0.80245 |
| CCT3    | miR-330-5p  | -0.80114 |
| CDC34   | miR-484     | -0.79869 |
| SMARCD2 | miR-324-5p  | -0.79208 |
| COL4A1  | miR-125a-5p | -0.79186 |
| HSPA1B  | miR-324-5p  | -0.79126 |
| TYMS    | miR-484     | -0.78939 |
| FASTK   | miR-331-3p  | -0.78821 |
| TCP1    | miR-342-3p  | -0.78739 |
| AP3M1   | miR-423-5p  | -0.78660 |
| COX8A   | miR-484     | -0.78476 |
| ATXN2L  | miR-324-3p  | -0.77795 |
| RPL27A  | miR-342-3p  | -0.77223 |
| ECHDC2  | miR-484     | -0.76793 |

|         |             |          |
|---------|-------------|----------|
| GEMIN4  | miR-484     | -0.76426 |
| PFKP    | miR-455-3p  | -0.76299 |
| MRPL14  | miR-324-5p  | -0.75299 |
| LYRM1   | miR-455-3p  | -0.74094 |
| FBXW2   | miR-484     | -0.73828 |
| CCNK    | miR-484     | -0.73766 |
| POLR2L  | miR-331-3p  | -0.73537 |
| PSMD4   | miR-324-5p  | -0.73373 |
| RPL26   | miR-342-3p  | -0.73322 |
| NSD1    | miR-423-5p  | -0.73230 |
| TRPM2   | miR-423-3p  | -0.72938 |
| RPS3    | miR-324-3p  | -0.72320 |
| POLR2E  | miR-339-5p  | -0.72264 |
| DNAJC11 | miR-324-5p  | -0.72025 |
| LRP11   | miR-455-3p  | -0.71622 |
| BSG     | miR-361-5p  | -0.71588 |
| ABCD4   | miR-484     | -0.70742 |
| ITCH    | miR-324-3p  | -0.70315 |
| SOX11   | miR-339-5p  | -0.70031 |
| YBX1    | miR-484     | -0.69785 |
| MGRN1   | miR-455-3p  | -0.69716 |
| TEX261  | miR-484     | -0.69631 |
| BRSK1   | miR-339-5p  | -0.69567 |
| TBC1D1  | miR-125a-5p | -0.69453 |
| SHCBP1  | miR-455-3p  | -0.69392 |
| RIOK2   | miR-484     | -0.68872 |
| UBC     | miR-324-3p  | -0.68741 |
| CLSTN1  | miR-455-3p  | -0.68560 |

|         |             |          |
|---------|-------------|----------|
| DBT     | miR-324-5p  | -0.68127 |
| TMEM50A | miR-484     | -0.67466 |
| NXT1    | miR-331-3p  | -0.67371 |
| FOXC1   | miR-324-5p  | -0.66937 |
| USPL1   | miR-324-5p  | -0.66723 |
| ZNF512B | miR-331-3p  | -0.66542 |
| RANBP2  | miR-423-3p  | -0.66498 |
| ATAD1   | miR-146b-5p | -0.66341 |
| POM121  | miR-423-3p  | -0.65999 |
| ABCC1   | miR-339-5p  | -0.65957 |
| FAU     | miR-140-3p  | -0.65087 |
| RNF167  | miR-484     | -0.64508 |
| GIGYF1  | miR-484     | -0.64451 |
| PHF23   | miR-484     | -0.64324 |
| CASC3   | miR-484     | -0.64292 |
| WBP2    | miR-423-5p  | -0.64172 |
| CEBPB   | miR-423-5p  | -0.63724 |
| EIF2B2  | miR-455-3p  | -0.63676 |
| PLEKHM2 | miR-455-3p  | -0.63518 |
| POLR2A  | miR-484     | -0.62776 |
| TXLNA   | miR-423-3p  | -0.62209 |
| LBX2    | miR-339-5p  | -0.62146 |
| ADCK2   | miR-484     | -0.61694 |
| CLPB    | miR-324-5p  | -0.61412 |
| CDCA4   | miR-331-3p  | -0.61397 |
| UNC45A  | miR-125a-5p | -0.61376 |
| SEC11A  | miR-484     | -0.60559 |
| LARP4   | miR-423-3p  | -0.60402 |

|          |             |          |
|----------|-------------|----------|
| ZIC5     | miR-324-5p  | -0.60385 |
| SYNM     | miR-331-3p  | -0.60352 |
| NUCKS1   | miR-484     | -0.60016 |
| YY1      | miR-484     | -0.59993 |
| NOC2L    | miR-484     | -0.59993 |
| KCTD15   | miR-423-5p  | -0.59955 |
| LNPEP    | miR-361-5p  | -0.59124 |
| PHB      | miR-484     | -0.58931 |
| AURKAIP1 | miR-331-3p  | -0.57772 |
| AIFM1    | miR-484     | -0.56857 |
| TUFM     | miR-324-5p  | -0.56614 |
| LUC7L3   | miR-484     | -0.56510 |
| RC3H2    | miR-484     | -0.56470 |
| COX7C    | miR-331-3p  | -0.55879 |
| PTP4A1   | miR-324-3p  | -0.55714 |
| RPL4     | miR-423-3p  | -0.55462 |
| SBF1     | miR-324-3p  | -0.55358 |
| SMG5     | miR-331-3p  | -0.55261 |
| SRCAP    | miR-484     | -0.54966 |
| SDF4     | miR-484     | -0.54961 |
| BCL9L    | miR-331-3p  | -0.53897 |
| LAMP1    | miR-484     | -0.53707 |
| RRP1B    | miR-125a-5p | -0.53095 |
| MAP3K10  | miR-484     | -0.52723 |
| MTCH2    | miR-423-5p  | -0.52711 |
| INO80D   | miR-342-3p  | -0.52103 |
| TPM4     | miR-125a-5p | -0.51935 |
| ATXN7L3  | miR-484     | -0.51240 |

|         |             |          |
|---------|-------------|----------|
| PGM3    | miR-455-3p  | -0.51204 |
| SF3B1   | miR-423-3p  | -0.50653 |
| WDR26   | miR-484     | -0.50650 |
| TIMM50  | miR-324-5p  | -0.50584 |
| SLC25A1 | miR-324-3p  | -0.50359 |
| VBP1    | miR-361-5p  | -0.50189 |
| MRPL50  | miR-125a-5p | -0.49804 |
| PKD1    | miR-484     | -0.49411 |
| ANAPC13 | miR-324-5p  | -0.49354 |
| SUV39H1 | miR-331-3p  | -0.49332 |
| CDC123  | miR-324-5p  | -0.49281 |
| PTMS    | miR-423-3p  | -0.49217 |
| PMM2    | miR-484     | -0.49178 |
| CASD1   | miR-140-5p  | -0.49149 |
| MEA1    | miR-324-5p  | -0.49121 |
| IGFBP5  | miR-331-3p  | -0.48779 |
| RPL26   | miR-423-3p  | -0.48035 |
| RPS14   | miR-331-3p  | -0.47834 |
| POLG    | miR-484     | -0.47697 |
| GRIPAP1 | miR-484     | -0.47666 |
| TRMT61B | miR-331-3p  | -0.47596 |
| RPLP0   | miR-331-3p  | -0.47520 |
| WNK3    | miR-125a-5p | -0.47178 |
| GNG12   | miR-423-5p  | -0.46768 |
| RPL3    | miR-423-3p  | -0.46069 |
| PDCL    | miR-423-3p  | -0.45853 |
| CUEDC2  | miR-331-3p  | -0.45616 |
| STX16   | miR-324-3p  | -0.45547 |

|          |             |          |
|----------|-------------|----------|
| STX1B    | miR-330-5p  | -0.43903 |
| PSMA4    | miR-324-5p  | -0.43018 |
| MRPS26   | miR-331-3p  | -0.42804 |
| TOMM40   | miR-484     | -0.42768 |
| SAP30BP  | miR-324-5p  | -0.42578 |
| LSM4     | miR-423-3p  | -0.42165 |
| RPL29    | miR-331-3p  | -0.40678 |
| NFATC3   | miR-361-3p  | -0.40306 |
| GIGYF1   | miR-324-5p  | -0.40251 |
| ISM2     | miR-484     | -0.40248 |
| ALAS1    | miR-484     | -0.39889 |
| WEE1     | miR-484     | -0.38970 |
| MBOAT7   | miR-484     | -0.38944 |
| PLA2G4F  | miR-331-3p  | -0.38938 |
| RBM39    | miR-484     | -0.38242 |
| TMEM129  | miR-324-5p  | -0.38228 |
| PDE12    | miR-484     | -0.38221 |
| NDUFS1   | miR-324-5p  | -0.37608 |
| PAM      | miR-125a-5p | -0.37469 |
| ARHGAP26 | miR-324-3p  | -0.37238 |
| PI4KA    | miR-484     | -0.37067 |
| POLR2C   | miR-324-3p  | -0.36692 |
| PKD1     | miR-324-5p  | -0.36414 |
| ECE1     | miR-484     | -0.35816 |
| EMID1    | miR-125a-5p | -0.35709 |
| PSMC4    | miR-331-3p  | -0.35673 |
| RAB1B    | miR-324-5p  | -0.35661 |
| COASY    | miR-331-3p  | -0.35589 |

|           |            |          |
|-----------|------------|----------|
| FASN      | miR-423-3p | -0.35335 |
| ATN1      | miR-484    | -0.35195 |
| DNAJA3    | miR-484    | -0.34756 |
| VASP      | miR-330-5p | -0.34621 |
| P4HB      | miR-484    | -0.34006 |
| WAC       | miR-484    | -0.33859 |
| RNF216    | miR-455-3p | -0.33682 |
| NMD3      | miR-484    | -0.33629 |
| RPL7A     | miR-331-3p | -0.33575 |
| CUEDC2    | miR-324-5p | -0.33339 |
| PRDX4     | miR-484    | -0.33163 |
| ACACA     | miR-324-3p | -0.33112 |
| YWHAH     | miR-324-5p | -0.33028 |
| RPL34     | miR-331-3p | -0.32927 |
| PCNT      | miR-484    | -0.32679 |
| NME3      | miR-324-5p | -0.32526 |
| DMAP1     | miR-331-3p | -0.32484 |
| DENND4B   | miR-501-3p | -0.32226 |
| SET       | miR-423-3p | -0.32145 |
| ACADS     | miR-484    | -0.31936 |
| PGK1      | miR-324-5p | -0.31712 |
| HDLBP     | miR-423-3p | -0.31107 |
| CSNK1A1   | miR-324-3p | -0.30965 |
| HOMER1    | miR-484    | -0.30926 |
| STK35     | miR-331-3p | -0.30902 |
| TNFAIP8L1 | miR-484    | -0.29910 |
| NHP2      | miR-324-3p | -0.29812 |
| MAP3K1    | miR-423-3p | -0.29753 |

|         |             |          |
|---------|-------------|----------|
| SPOPL   | miR-324-5p  | -0.28651 |
| KLHL15  | miR-423-3p  | -0.28583 |
| PSMD8   | miR-484     | -0.28538 |
| POLR3H  | miR-331-3p  | -0.28434 |
| TACC1   | miR-342-3p  | -0.28211 |
| GGA3    | miR-423-5p  | -0.28021 |
| ELOVL1  | miR-455-3p  | -0.27644 |
| ADRA1A  | miR-484     | -0.27116 |
| WIZ     | miR-324-5p  | -0.26877 |
| PHKB    | miR-484     | -0.26509 |
| NUS1    | miR-484     | -0.25889 |
| LETM1   | miR-331-3p  | -0.25844 |
| APRT    | miR-484     | -0.25573 |
| PLCB1   | miR-423-5p  | -0.25372 |
| AP1B1   | miR-455-3p  | -0.24592 |
| ATP8B2  | miR-331-3p  | -0.24589 |
| TRIM65  | miR-484     | -0.24261 |
| DYNC1H1 | miR-455-3p  | -0.24246 |
| RAVER1  | miR-361-5p  | -0.22926 |
| BCL2L1  | miR-484     | -0.22864 |
| SOBP    | miR-324-5p  | -0.22490 |
| ASCC2   | miR-484     | -0.22475 |
| ZC3H7B  | miR-193a-5p | -0.22316 |
| CAPZB   | miR-324-3p  | -0.22131 |
| PPA1    | miR-361-5p  | -0.22103 |
| ABHD12  | miR-484     | -0.22054 |
| PGM3    | miR-125a-5p | -0.21740 |
| NPLOC4  | miR-423-5p  | -0.21367 |



|          |             |          |
|----------|-------------|----------|
| NUP188   | miR-324-5p  | -0.21364 |
| CNOT1    | miR-423-3p  | -0.21222 |
| ZFYVE27  | miR-423-3p  | -0.21159 |
| IRAK1    | miR-330-5p  | -0.20494 |
| GNB2     | miR-484     | -0.20082 |
| PDPK1    | miR-423-5p  | -0.19443 |
| SBK1     | miR-532-3p  | -0.18793 |
| PCBD1    | miR-331-3p  | -0.18132 |
| DCTN5    | miR-193a-3p | -0.18063 |
| NISCH    | miR-455-3p  | -0.17993 |
| ARRB2    | miR-330-5p  | -0.17980 |
| ILF3     | miR-532-3p  | -0.17976 |
| AP2M1    | miR-484     | -0.17800 |
| ROBO1    | miR-423-3p  | -0.17252 |
| KCTD15   | miR-342-3p  | -0.17192 |
| ALAS1    | miR-423-3p  | -0.17063 |
| TCF3     | miR-342-3p  | -0.17047 |
| HNRNPUL1 | miR-423-3p  | -0.17026 |
| SAP18    | miR-324-3p  | -0.16792 |
| ASF1B    | miR-324-5p  | -0.16571 |
| HIPK2    | miR-423-5p  | -0.16529 |
| CALR     | miR-423-3p  | -0.16513 |
| FAM83H   | miR-423-5p  | -0.16106 |
| YTHDF1   | miR-331-3p  | -0.15704 |
| GNS      | miR-484     | -0.15621 |
| ARFGAP1  | miR-423-3p  | -0.15217 |
| MECP2    | miR-331-3p  | -0.13294 |
| AK2      | miR-193a-3p | -0.13157 |

|          |             |          |
|----------|-------------|----------|
| PGRMC1   | miR-455-3p  | -0.13084 |
| TRIM23   | miR-455-5p  | -0.13021 |
| SLC25A5  | miR-361-5p  | -0.12984 |
| KPNA2    | miR-342-3p  | -0.12923 |
| GANAB    | miR-484     | -0.12889 |
| SPTB     | miR-331-3p  | -0.12852 |
| DDX56    | miR-331-3p  | -0.12773 |
| MTHFR    | miR-423-3p  | -0.11923 |
| EPM2AIP1 | miR-423-5p  | -0.11699 |
| PHTF1    | miR-484     | -0.11684 |
| HUWE1    | miR-324-3p  | -0.11274 |
| RTN3     | miR-484     | -0.10879 |
| BCLAF1   | miR-423-5p  | -0.10727 |
| WRAP53   | miR-455-3p  | -0.10259 |
| CHCHD3   | miR-423-3p  | -0.09823 |
| EXOC7    | miR-331-3p  | -0.09759 |
| SALL2    | miR-484     | -0.08909 |
| GNB2     | miR-331-3p  | -0.08692 |
| LRCH4    | miR-423-5p  | -0.08192 |
| EDC3     | miR-324-5p  | -0.07175 |
| MED22    | miR-331-3p  | -0.06909 |
| CRB2     | miR-342-3p  | -0.06854 |
| UBE2Q2   | miR-331-3p  | -0.06283 |
| TSPAN3   | miR-484     | -0.05973 |
| BOP1     | miR-324-5p  | -0.05796 |
| TMED9    | miR-484     | -0.05366 |
| BAIAP2   | miR-455-3p  | -0.04032 |
| MACF1    | miR-125a-5p | -0.03858 |

|         |             |          |
|---------|-------------|----------|
| COL6A1  | miR-324-5p  | -0.03834 |
| GNAS    | miR-324-3p  | -0.03427 |
| SF3B2   | miR-331-3p  | -0.03314 |
| FXR2    | miR-324-3p  | -0.03189 |
| NPTX2   | miR-423-3p  | -0.02829 |
| SMG6    | miR-331-3p  | -0.02545 |
| RPN2    | miR-484     | -0.01973 |
| MICALL1 | miR-423-5p  | -0.01794 |
| KREMEN1 | miR-484     | -0.01387 |
| ZFC3H1  | miR-342-3p  | -0.01109 |
| TJAP1   | miR-331-3p  | -0.00832 |
| MED14   | miR-532-3p  | -0.00660 |
| RFT1    | miR-330-5p  | -0.00233 |
| DDX11   | miR-324-5p  | -0.00214 |
| TUBGCP6 | miR-324-5p  | 0.00373  |
| REXO1   | miR-484     | 0.01123  |
| ARMC6   | miR-484     | 0.01136  |
| TBC1D2B | miR-484     | 0.01242  |
| CBX1    | miR-342-3p  | 0.01251  |
| GRK6    | miR-361-5p  | 0.02378  |
| SS18    | miR-331-3p  | 0.02542  |
| PGD     | miR-339-5p  | 0.02912  |
| EEF1A1  | miR-361-3p  | 0.02978  |
| CPSF2   | miR-193a-3p | 0.03072  |
| PFKL    | miR-423-3p  | 0.03324  |
| CLSTN1  | miR-423-5p  | 0.03771  |
| CCDC47  | miR-484     | 0.03959  |
| RANGAP1 | miR-331-3p  | 0.04404  |

|         |            |         |
|---------|------------|---------|
| ZBTB34  | miR-423-5p | 0.04460 |
| PWP2    | miR-342-3p | 0.04651 |
| KPNB1   | miR-455-3p | 0.04927 |
| TMEM9B  | miR-484    | 0.05482 |
| TNRC6B  | miR-484    | 0.05515 |
| BLMH    | miR-484    | 0.05830 |
| TXLNA   | miR-484    | 0.06246 |
| XRCC6   | miR-484    | 0.06297 |
| EMD     | miR-484    | 0.06487 |
| AKAP13  | miR-423-5p | 0.06657 |
| RASL10B | miR-331-3p | 0.06777 |
| SRF     | miR-331-3p | 0.06979 |
| RANBP10 | miR-330-5p | 0.07211 |
| ARAF    | miR-331-3p | 0.07236 |
| TFCP2   | miR-331-3p | 0.07380 |
| TARS2   | miR-484    | 0.07728 |
| GOT2    | miR-484    | 0.08313 |
| GJA1    | miR-342-3p | 0.08391 |
| MSL3    | miR-484    | 0.08508 |
| PIN1    | miR-484    | 0.08634 |
| CYB5R3  | miR-484    | 0.08708 |
| BAHD1   | miR-324-3p | 0.09225 |
| NGRN    | miR-342-3p | 0.09600 |
| KLHL15  | miR-532-3p | 0.09640 |
| CASP7   | miR-484    | 0.09814 |
| POLR2L  | miR-423-3p | 0.09881 |
| NUBP1   | miR-423-3p | 0.09891 |
| CCND2   | miR-342-3p | 0.09913 |

|         |            |         |
|---------|------------|---------|
| TIA1    | miR-331-3p | 0.09921 |
| GLDC    | miR-423-3p | 0.10023 |
| HMGA1   | miR-331-3p | 0.10341 |
| TUBGCP4 | miR-484    | 0.11117 |
| FANCD2  | miR-331-3p | 0.12052 |
| PLOD1   | miR-484    | 0.12160 |
| SCAP    | miR-484    | 0.12556 |
| PARM1   | miR-324-5p | 0.13679 |
| DHCR24  | miR-484    | 0.13725 |
| HSP90B1 | miR-484    | 0.13814 |
| POLD1   | miR-324-5p | 0.13830 |
| FLT4    | miR-331-3p | 0.13862 |
| EXOGEN  | miR-484    | 0.14110 |
| SREBF1  | miR-484    | 0.14223 |
| ANXA5   | miR-330-5p | 0.14269 |
| RRM2    | miR-484    | 0.14340 |
| NANS    | miR-324-5p | 0.15372 |
| USP10   | miR-455-3p | 0.15378 |
| MID2    | miR-324-5p | 0.15425 |
| EZH2    | miR-484    | 0.15832 |
| MPP2    | miR-484    | 0.16015 |
| PML     | miR-423-3p | 0.16110 |
| TBCB    | miR-324-5p | 0.16501 |
| NUCB1   | miR-484    | 0.16620 |
| SLC4A2  | miR-455-3p | 0.16770 |
| CYCS    | miR-361-5p | 0.16816 |
| HSPBP1  | miR-484    | 0.16933 |
| TRERF1  | miR-324-5p | 0.17515 |

|           |             |         |
|-----------|-------------|---------|
| PUM1      | miR-324-3p  | 0.17730 |
| BACE2     | miR-484     | 0.18217 |
| CIAPIN1   | miR-361-3p  | 0.18732 |
| UBTF      | miR-484     | 0.18919 |
| HNRNPM    | miR-331-3p  | 0.19242 |
| GHITM     | miR-484     | 0.19261 |
| PSMD7     | miR-331-3p  | 0.19707 |
| TIPIN     | miR-484     | 0.20188 |
| PLA2G4F   | miR-125a-5p | 0.20339 |
| GAPDH     | miR-324-3p  | 0.21235 |
| POLDIP3   | miR-331-3p  | 0.21673 |
| FOSL2     | miR-342-3p  | 0.21786 |
| FASN      | miR-484     | 0.21832 |
| FLII      | miR-331-3p  | 0.22278 |
| SLC11A2   | miR-484     | 0.22402 |
| PSMD6     | miR-331-3p  | 0.22674 |
| KDM2B     | miR-324-3p  | 0.22716 |
| DYRK2     | miR-484     | 0.22780 |
| TNFRSF12A | miR-484     | 0.22790 |
| POLR3K    | miR-484     | 0.22864 |
| SCMH1     | miR-532-3p  | 0.22986 |
| USP5      | miR-455-3p  | 0.23068 |
| GNB2      | miR-324-5p  | 0.23170 |
| FIGN      | miR-342-3p  | 0.23178 |
| AGAP1     | miR-324-5p  | 0.23410 |
| PTP4A2    | miR-331-3p  | 0.24057 |
| INTS4     | miR-455-3p  | 0.24118 |
| CCDC97    | miR-484     | 0.24176 |

|          |             |         |
|----------|-------------|---------|
| UBE2I    | miR-324-5p  | 0.24287 |
| PTK7     | miR-324-5p  | 0.24413 |
| FAM3C    | miR-342-3p  | 0.24720 |
| UBE4B    | miR-423-3p  | 0.25010 |
| SMC1A    | miR-339-5p  | 0.25102 |
| APRT     | miR-324-3p  | 0.25394 |
| ATP2A2   | miR-484     | 0.25743 |
| LAMB1    | miR-125a-5p | 0.25911 |
| CHTF18   | miR-484     | 0.25973 |
| PSMD1    | miR-423-3p  | 0.26014 |
| ACLY     | miR-484     | 0.26526 |
| CLN6     | miR-324-5p  | 0.26849 |
| PMS2     | miR-324-5p  | 0.27077 |
| ANKRD13D | miR-331-3p  | 0.27264 |
| DRAP1    | miR-423-5p  | 0.27440 |
| PFAS     | miR-324-5p  | 0.27566 |
| FDX1     | miR-455-3p  | 0.27610 |
| TDRKH    | miR-423-5p  | 0.27646 |
| FADS2    | miR-423-3p  | 0.28407 |
| RRBP1    | miR-331-3p  | 0.28785 |
| NCLN     | miR-331-3p  | 0.28923 |
| HNRNPH2  | miR-484     | 0.29265 |
| GBA2     | miR-455-3p  | 0.29444 |
| ACTG1    | miR-342-3p  | 0.29580 |
| RABAC1   | miR-423-5p  | 0.30147 |
| YWHAZ    | miR-484     | 0.30883 |
| SMO      | miR-331-3p  | 0.31002 |
| SH3BP2   | miR-331-3p  | 0.31614 |

|          |            |         |
|----------|------------|---------|
| HNRNPA1  | miR-339-5p | 0.31752 |
| LDHB     | miR-324-5p | 0.31946 |
| STMN1    | miR-484    | 0.32381 |
| KCTD2    | miR-423-5p | 0.32427 |
| DDX54    | miR-484    | 0.32561 |
| DLG5     | miR-484    | 0.32778 |
| ATXN7L3B | miR-484    | 0.33243 |
| GATA6    | miR-140-5p | 0.33375 |
| CHD8     | miR-423-5p | 0.33384 |
| EXOC6B   | miR-331-3p | 0.33679 |
| MDH2     | miR-484    | 0.34253 |
| HGS      | miR-423-3p | 0.34276 |
| ANAPC1   | miR-484    | 0.34319 |
| XPOT     | miR-342-3p | 0.34493 |
| SLC10A7  | miR-484    | 0.34881 |
| GNPAT    | miR-331-3p | 0.34964 |
| USF2     | miR-339-5p | 0.35238 |
| CNOT2    | miR-361-5p | 0.35249 |
| SLC9A3R1 | miR-423-5p | 0.35316 |
| CRY2     | miR-532-3p | 0.35483 |
| APP      | miR-423-3p | 0.35513 |
| WBP2     | miR-324-5p | 0.35592 |
| ANXA6    | miR-324-5p | 0.35835 |
| CAD      | miR-455-3p | 0.36287 |
| MTHFD1   | miR-324-5p | 0.36514 |
| MAP4     | miR-331-3p | 0.36765 |
| NDE1     | miR-423-3p | 0.36782 |
| GOT2     | miR-342-3p | 0.36786 |



|          |            |         |
|----------|------------|---------|
| MIER2    | miR-423-5p | 0.37112 |
| PRKCE    | miR-342-3p | 0.37582 |
| ATP6V1E1 | miR-423-5p | 0.37901 |
| HMGXB3   | miR-324-5p | 0.37908 |
| VPS18    | miR-324-3p | 0.38240 |
| CXXC1    | miR-324-3p | 0.38301 |
| PSMD2    | miR-331-3p | 0.38547 |
| SF3B3    | miR-324-3p | 0.39445 |
| MED15    | miR-324-3p | 0.39448 |
| BOK      | miR-331-3p | 0.39528 |
| MLLT1    | miR-484    | 0.39759 |
| SLC4A2   | miR-484    | 0.39886 |
| GALM     | miR-455-3p | 0.40060 |
| SPEN     | miR-324-5p | 0.40065 |
| CRTAP    | miR-484    | 0.40175 |
| DNMT1    | miR-484    | 0.40199 |
| UCK2     | miR-361-5p | 0.40322 |
| KDM5C    | miR-484    | 0.40332 |
| TRERF1   | miR-342-3p | 0.40453 |
| EXOSC10  | miR-484    | 0.40568 |
| NHP2     | miR-330-5p | 0.40932 |
| PXDN     | miR-324-5p | 0.41359 |
| HIPK1    | miR-484    | 0.41773 |
| ATP2B4   | miR-423-5p | 0.41873 |
| JAG2     | miR-484    | 0.41979 |
| TCOF1    | miR-324-5p | 0.42182 |
| DDX23    | miR-361-5p | 0.42339 |
| HYOU1    | miR-484    | 0.42401 |

|          |             |         |
|----------|-------------|---------|
| IRAK1    | miR-423-3p  | 0.42492 |
| PHGDH    | miR-331-3p  | 0.42535 |
| LDHA     | miR-331-3p  | 0.42587 |
| PSMD2    | miR-361-5p  | 0.43131 |
| FASN     | miR-331-3p  | 0.43436 |
| KIF1A    | miR-423-5p  | 0.43448 |
| FLII     | miR-423-3p  | 0.43489 |
| CDS2     | miR-484     | 0.43827 |
| FBXL5    | miR-331-3p  | 0.43829 |
| TFE3     | miR-455-3p  | 0.43875 |
| SF3B4    | miR-423-3p  | 0.43924 |
| FRMD4A   | miR-423-3p  | 0.44483 |
| TBC1D22A | miR-484     | 0.44631 |
| SP3      | miR-484     | 0.44818 |
| DGKZ     | miR-331-3p  | 0.44834 |
| UCP2     | miR-484     | 0.44929 |
| CEBPA    | miR-193a-5p | 0.44962 |
| ASXL1    | miR-484     | 0.45026 |
| MED18    | miR-532-3p  | 0.45101 |
| FLNA     | miR-331-3p  | 0.45133 |
| ACTA2    | miR-484     | 0.45481 |
| MAPRE2   | miR-455-3p  | 0.45637 |
| PIAS4    | miR-324-5p  | 0.45864 |
| MRPL3    | miR-484     | 0.45957 |
| HPS1     | miR-331-3p  | 0.46207 |
| NPEPPS   | miR-484     | 0.46299 |
| TNKS     | miR-324-5p  | 0.46447 |
| USP5     | miR-484     | 0.46969 |

|           |            |         |
|-----------|------------|---------|
| TOR1AIP2  | miR-455-3p | 0.47414 |
| XRCC5     | miR-331-3p | 0.47436 |
| RAB11FIP1 | miR-324-5p | 0.47681 |
| RCE1      | miR-484    | 0.47857 |
| EIF4G2    | miR-331-3p | 0.47896 |
| PSMD1     | miR-331-3p | 0.47955 |
| ZER1      | miR-331-3p | 0.48262 |
| ABCC5     | miR-423-5p | 0.48312 |
| PTPRF     | miR-455-3p | 0.48569 |
| DHX40     | miR-484    | 0.48677 |
| DGCR2     | miR-484    | 0.48750 |
| HNRNPM    | miR-484    | 0.48879 |
| RUVBL2    | miR-324-3p | 0.49071 |
| INTS5     | miR-484    | 0.49096 |
| ACTB      | miR-324-5p | 0.50154 |
| IQGAP1    | miR-324-3p | 0.50348 |
| MTR       | miR-484    | 0.50688 |
| IDS       | miR-342-3p | 0.50898 |
| FAM160B2  | miR-484    | 0.50959 |
| MTHFD1L   | miR-484    | 0.51221 |
| SNX7      | miR-324-5p | 0.51355 |
| HNRNPF    | miR-339-5p | 0.51529 |
| SLC25A14  | miR-331-3p | 0.51699 |
| CHPF2     | miR-339-5p | 0.52170 |
| PI4KB     | miR-331-3p | 0.53425 |
| TUBA1C    | miR-324-5p | 0.53538 |
| EPN1      | miR-423-5p | 0.53624 |
| ZBTB4     | miR-331-3p | 0.53665 |

|         |             |         |
|---------|-------------|---------|
| ACLY    | miR-361-5p  | 0.53765 |
| COL14A1 | miR-324-5p  | 0.54237 |
| LRRC20  | miR-484     | 0.54278 |
| CSTB    | miR-423-5p  | 0.54419 |
| XRCC6   | miR-324-3p  | 0.55109 |
| SEMA3D  | miR-193a-3p | 0.55141 |
| PHKA1   | miR-484     | 0.55277 |
| HYOU1   | miR-455-3p  | 0.55436 |
| FTSJ3   | miR-330-5p  | 0.55457 |
| OSTC    | miR-324-5p  | 0.55877 |
| LRRC8B  | miR-423-3p  | 0.55955 |
| SLC30A5 | miR-361-5p  | 0.56118 |
| GAPDH   | miR-484     | 0.56453 |
| TEP1    | miR-484     | 0.56871 |
| ACIN1   | miR-324-5p  | 0.56888 |
| ARF1    | miR-324-5p  | 0.57000 |
| AXIN1   | miR-484     | 0.57278 |
| EEF1A1  | miR-339-5p  | 0.57362 |
| TMUB1   | miR-423-5p  | 0.57633 |
| CHAF1B  | miR-484     | 0.57709 |
| AKT3    | miR-146b-5p | 0.57895 |
| TMEM8B  | miR-324-5p  | 0.58017 |
| RRAGD   | miR-484     | 0.58198 |
| SYK     | miR-331-3p  | 0.58293 |
| CFL1    | miR-324-5p  | 0.58755 |
| CDCA7L  | miR-484     | 0.59133 |
| PPP2R5E | miR-125a-5p | 0.59156 |
| KLHDC3  | miR-324-5p  | 0.59860 |

|         |             |         |
|---------|-------------|---------|
| AKAP13  | miR-484     | 0.60017 |
| ATXN7L3 | miR-125a-5p | 0.60030 |
| GIGYF2  | miR-455-3p  | 0.60390 |
| NOLC1   | miR-423-5p  | 0.60566 |
| GTF3C1  | miR-484     | 0.60578 |
| CFL1    | miR-484     | 0.60725 |
| AKIRIN1 | miR-331-3p  | 0.61067 |
| SNX11   | miR-484     | 0.61068 |
| CYFIP2  | miR-423-3p  | 0.61682 |
| PTPN13  | miR-331-3p  | 0.62076 |
| SPTBN1  | miR-423-3p  | 0.62519 |
| XRCC6   | miR-423-3p  | 0.63185 |
| CD2AP   | miR-484     | 0.63861 |
| SRRM2   | miR-455-3p  | 0.64132 |
| SON     | miR-455-3p  | 0.64269 |
| GTF2H3  | miR-484     | 0.64721 |
| CTNNB1  | miR-331-3p  | 0.64949 |
| MAP4    | miR-484     | 0.65377 |
| CLEC16A | miR-331-3p  | 0.65468 |
| VPS4A   | miR-455-3p  | 0.65728 |
| FAM117A | miR-484     | 0.65766 |
| SLC39A8 | miR-331-3p  | 0.65969 |
| SPIRE1  | miR-484     | 0.66350 |
| SON     | miR-361-5p  | 0.66513 |
| RAP2B   | miR-324-5p  | 0.66516 |
| TCF19   | miR-484     | 0.66968 |
| TROAP   | miR-484     | 0.67836 |
| WNK1    | miR-331-3p  | 0.67867 |

|          |             |         |
|----------|-------------|---------|
| NOTCH3   | miR-484     | 0.67867 |
| TUT1     | miR-193a-3p | 0.68800 |
| CHSY3    | miR-484     | 0.68921 |
| BRCA1    | miR-484     | 0.69097 |
| TUBA1B   | miR-324-5p  | 0.69443 |
| RUNX2    | miR-484     | 0.69977 |
| ACTR1A   | miR-331-3p  | 0.70208 |
| PPARD    | miR-331-3p  | 0.70508 |
| DRG1     | miR-455-5p  | 0.70785 |
| MSH6     | miR-324-5p  | 0.70816 |
| PGAM1    | miR-324-5p  | 0.70821 |
| RPS5     | miR-455-3p  | 0.71093 |
| UBE2Z    | miR-484     | 0.71350 |
| SREBF2   | miR-331-3p  | 0.71752 |
| SCML2    | miR-423-3p  | 0.71771 |
| CEP78    | miR-423-3p  | 0.72251 |
| MED15    | miR-484     | 0.72409 |
| FLOT1    | miR-484     | 0.72535 |
| UBA1     | miR-331-3p  | 0.72598 |
| RPL8     | miR-455-3p  | 0.72733 |
| PEPD     | miR-423-3p  | 0.73390 |
| KNTC1    | miR-484     | 0.73507 |
| BAD      | miR-330-5p  | 0.74148 |
| TRIM28   | miR-423-5p  | 0.74587 |
| BTBD2    | miR-324-5p  | 0.74716 |
| ARHGAP17 | miR-324-3p  | 0.74811 |
| KLC2     | miR-331-3p  | 0.74876 |
| MAP2K7   | miR-125a-5p | 0.74909 |

|          |             |         |
|----------|-------------|---------|
| CWC22    | miR-484     | 0.75275 |
| MYO9B    | miR-484     | 0.75342 |
| ASS1     | miR-324-5p  | 0.75721 |
| MYO5A    | miR-484     | 0.75809 |
| FURIN    | miR-484     | 0.75890 |
| AGK      | miR-484     | 0.76318 |
| FYCO1    | miR-484     | 0.76869 |
| RPS2     | miR-455-3p  | 0.77309 |
| EEF1A1   | miR-125a-5p | 0.77605 |
| TBRG1    | miR-484     | 0.77621 |
| UBQLN2   | miR-484     | 0.78200 |
| BCL2L12  | miR-455-3p  | 0.78288 |
| N4BP2L2  | miR-455-3p  | 0.79396 |
| TUFT1    | miR-330-5p  | 0.79505 |
| PLXNB2   | miR-331-3p  | 0.80178 |
| PREPL    | miR-125a-5p | 0.80259 |
| CBS      | miR-324-5p  | 0.80374 |
| RFX3     | miR-342-3p  | 0.80880 |
| HCLS1    | miR-484     | 0.81417 |
| AP2A2    | miR-331-3p  | 0.81497 |
| KIF3B    | miR-324-5p  | 0.81886 |
| ITM2C    | miR-324-5p  | 0.81960 |
| TBC1D10B | miR-324-5p  | 0.82071 |
| CLCN7    | miR-125a-5p | 0.82246 |
| MCM4     | miR-324-3p  | 0.82345 |
| PFKL     | miR-484     | 0.82378 |
| WBP2     | miR-361-5p  | 0.82476 |
| FAM168B  | miR-331-3p  | 0.82649 |

|         |             |         |
|---------|-------------|---------|
| CDS1    | miR-324-5p  | 0.82827 |
| PPM1F   | miR-324-5p  | 0.83477 |
| PGAM1   | miR-484     | 0.83596 |
| MSI2    | miR-484     | 0.83625 |
| NFE2L1  | miR-484     | 0.84118 |
| FGFBP3  | miR-484     | 0.84154 |
| IRS2    | miR-484     | 0.84374 |
| BBX     | miR-484     | 0.84374 |
| ENO1    | miR-484     | 0.84470 |
| DDX18   | miR-324-3p  | 0.84984 |
| TRAFD1  | miR-324-5p  | 0.85198 |
| HNRNPC  | miR-484     | 0.85318 |
| RNF26   | miR-324-5p  | 0.85757 |
| TMEM115 | miR-455-3p  | 0.85779 |
| HNRNPA1 | miR-324-5p  | 0.85801 |
| ORAI2   | miR-484     | 0.85868 |
| DYRK1B  | miR-324-5p  | 0.85949 |
| HK2     | miR-484     | 0.85979 |
| ZDHHC9  | miR-125a-5p | 0.86848 |
| RPS15A  | miR-455-3p  | 0.87341 |
| RFX5    | miR-484     | 0.88081 |
| AP1B1   | miR-484     | 0.88723 |
| ATN1    | miR-423-5p  | 0.88796 |
| ZFX     | miR-484     | 0.88824 |
| NEO1    | miR-484     | 0.89283 |
| MLH3    | miR-484     | 0.89346 |
| UBA1    | miR-324-5p  | 0.89369 |
| THRAP3  | miR-125a-5p | 0.89648 |



|          |             |         |
|----------|-------------|---------|
| AMMECR1L | miR-484     | 0.90135 |
| PLD3     | miR-484     | 0.90738 |
| KLC2     | miR-484     | 0.90892 |
| MAPKAPK2 | miR-324-5p  | 0.91362 |
| PHLPP1   | miR-484     | 0.91483 |
| ADAM10   | miR-484     | 0.92008 |
| ITGA9    | miR-484     | 0.92283 |
| SNRPB2   | miR-193a-3p | 0.92378 |
| PRKCD    | miR-484     | 0.92477 |
| SEMA4D   | miR-484     | 0.92866 |
| AKT1S1   | miR-484     | 0.92875 |
| ARNT     | miR-324-5p  | 0.93832 |
| PLS3     | miR-125a-5p | 0.95874 |
| CAPRIN1  | miR-484     | 0.96027 |
| FKBP4    | miR-423-5p  | 0.97889 |
